# Supplementary material
Source: PubMed Central journal article supplement (PMC3181382)

G1- CL+CROMOLIN / G2- CL+PBS / G3- CL / G4- PBS+CROMOLIN / G5- PBS+PBS / G6- PBS

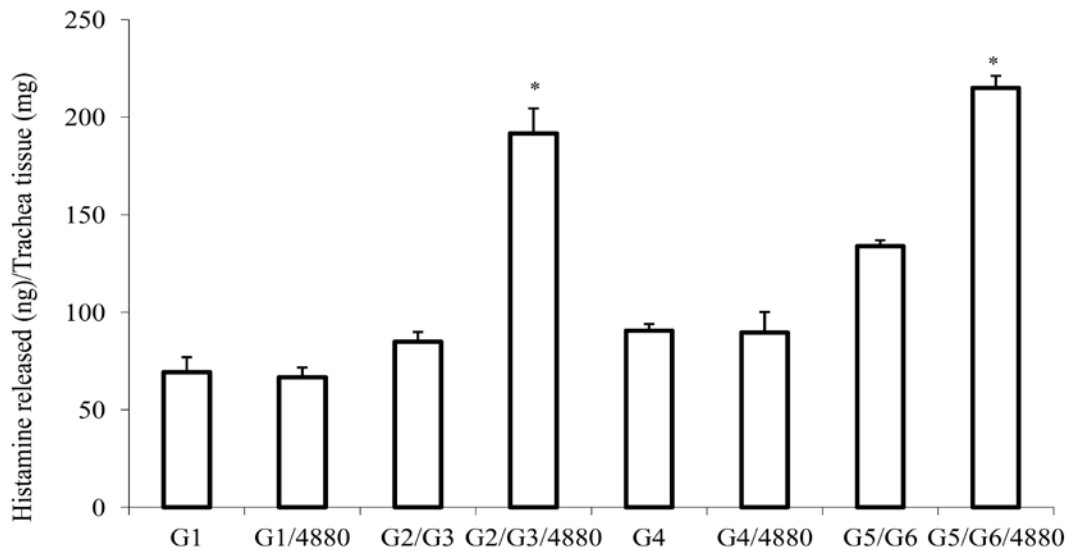

\* p<0,05 in relation to without 4880 stimuli.

Supplement: mmc1.pdf [file mmc1.pdf]

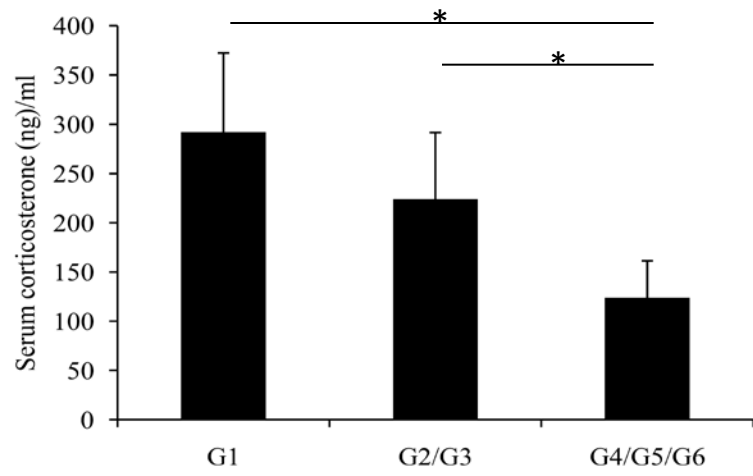

Meuser-Batista, M. – SUPPLEMENTAL FIGURE 2

Supplement: mmc2.pdf [file mmc2.pdf]
